# Supplementary material
Source: ML conference proceedings conference paper supplement (https://proceedings.neurips.cc/paper_files/paper/2022/hash/58168e8a92994655d6da3939e7cc0918-Abstract.html)
Supplement: Supplementary file 1 [file 58168e8a92994655d6da3939e7cc0918-Supplemental-Datasets_and_Benchmarks.zip]

Archive with 26 entries (23 files):
- supplementary/
- supplementary/TAP-Vid_supplementary.pdf
- supplementary/davis.html
- supplementary/index.html
- supplementary/style.css
- supplementary/robotics.html
- supplementary/point_tracks_prediction/
- supplementary/point_tracks_prediction/robotic_videos1.mp4
- supplementary/point_tracks_prediction/india.mp4
- supplementary/point_tracks_prediction/robotic_videos3.mp4
- supplementary/point_tracks_prediction/goat.mp4
- supplementary/point_tracks_prediction/camel.mp4
- supplementary/point_tracks_prediction/blackswan.mp4
- supplementary/point_tracks_prediction/robotic_videos2.mp4
- supplementary/point_tracks_prediction/robotic_videos0.mp4
- supplementary/kubric_videos_for_annotation/
- supplementary/kubric_videos_for_annotation/0.mp4
- supplementary/kubric_videos_for_annotation/7.mp4
- supplementary/kubric_videos_for_annotation/9.mp4
- supplementary/kubric_videos_for_annotation/4.mp4
- supplementary/kubric_videos_for_annotation/5.mp4
- supplementary/kubric_videos_for_annotation/6.mp4
- supplementary/kubric_videos_for_annotation/1.mp4
- supplementary/kubric_videos_for_annotation/2.mp4
- supplementary/kubric_videos_for_annotation/8.mp4
- supplementary/kubric_videos_for_annotation/3.mp4
