# Supplementary material
Source: ML conference proceedings conference paper supplement (https://proceedings.neurips.cc/paper_files/paper/2022/hash/58168e8a92994655d6da3939e7cc0918-Abstract.html)
Supplement: Supplementary file 1 [file 58168e8a92994655d6da3939e7cc0918-Supplemental-Datasets_and_Benchmarks.zip › supplementary/style.css]

/********************
CREDIT:

CSS template for my academic/project webpages.
Feel free to use/edit.
Credits appreciated.

(C) Abhinav Shrivastava, 2011
http://www.abhinav-shrivastava.info
********************/

body {
  background-color: white;
  color: black;
  text-align:center;
}

p {
    font-style: normal;
    font-weight: normal;
    font-size: 0.9em;
}

#primarycontent a:link {
    color: #009;
    text-decoration: none;
}

#primarycontent a:visited {
    color: #00F;
    text-decoration: none;
    /*color: #8d9345; */
}

#primarycontent a:hover {
    text-decoration: underline;
}

#primarycontent {
  max-width: 800px;
  width: expression(document.body.clientWidth > 800? "800px": "auto" );
  text-align: left;
  margin-left: auto;
  margin-right: auto;
  color: black;
  font-family: Arial, sans-serif;
  font-style: normal;
  font-weight: normal;
  font-size: 0.9em;
}

video {
    /* override other styles to make responsive */
    width: 100%    !important;
    height: auto   !important;
}

#primarycontent h3{
	border-bottom: 1px solid darkgray;
	text-align: left;
    padding: 0 0 0.2em 0.5em;
    margin: 2em 0 0 0;
}

td {
    padding-top:20px;
    padding-bottom:20px;
}

table { 
    margin-left: auto;
    margin-right: auto;
}

#primarycontent h1 {
    font-variant: small-caps;
    text-align: center;
}

#primarycontent teasertext {
    text-align: center;
}

#primarycontent {
    text-align: justify;
}
#primarycontent p {
    text-align: justify;
}
#primarycontent p iframe {
    text-align: center;
}
.featart {
  margin:4px;
}
.hoverdiv {
  background-color:black;
  margin-top:2px;
  margin-bottom:10px;
  width:100%;
}
.hoverdiv:hover {
  background-color:white;
}
